# Supplementary material
Source: PubMed Central journal article supplement (PMC3753118)
Supplement: NIHMS444954-supplement-supplemental_appendix.pdf [file NIHMS444954-supplement-supplemental_appendix.pdf]

# Bayesian Gaussian Copula Factor Models for Mixed Data (Supplement)

## 1 Conditional independence

Assume  $F(Y_1, Y_2, Y_3)$  has a Gaussian copula with correlation matrix  $\mathbf{C}$ , that  $Y_3$  is discrete, and that  $r_{12} = 0$ . Let  $(Z_1, Z_2, Z_3) \sim N(\mathbf{0}, \mathbf{C})$  and  $\mathcal{B}_c = (F_3(c-1), F_3(c)]$  for  $c$  in the domain of  $Y_3$  and define  $g_j(z_3) = \Phi(F_j(y_j) - c_{j3}z_3)/(1 - c_{j3}^2)^{1/2}$ . It is straightforward to show that

$$Pr(Y_1 \leq y_1 | Y_3 = c) Pr(Y_2 \leq y_2 | Y_3 = c) = E(g_1(z_3)) E(g_2(z_3)) \quad (1.1)$$

$$Pr(Y_1 \leq y_1, Y_2 \leq y_2 | Y_3 = c) = E(g_1(z_3) g_2(z_3)) \quad (1.2)$$

where the expectations are with respect to  $\pi(z_3 | y_3 = c) = TN(0, 1, F_3(c-1), F_3(c))$  and (1.2) holds because  $\pi(z_1, z_2 | z_3) = \pi(z_1 | z_3) \pi(z_2 | z_3)$  when  $r_{12} = 0$ . Since  $g_1, g_2$  are monotone it is well known that  $E(g_1(z_3) g_2(z_3)) \neq E(g_1(z_3)) E(g_2(z_3))$  (and  $Y_1, Y_2$  are dependent given  $Y_3$ ) unless one or both functions are a.s. constant, which occurs only if one or both of  $Y_1, Y_2$  are marginally independent of  $Y_3$  ( $c_{13} c_{23} = 0$ ). This result extends to conditioning on one discrete variable and any number of continuous variables since conditioning on a continuous variable  $Y_4 = y_4$  implies that  $Pr(z_4 = \Phi^{-1}(F(y_4))) = 1$ , and  $\pi(z_3 | y_3, z_4)$  is again univariate truncated normal (with a different mean and variance).

## 2 Posterior Predictive Conditional Distributions

To sample from conditional posterior predictive distributions such as  $\pi(y_1^* \mid \mathbf{y}_{(-1)}^* = \mathbf{x}, \mathbf{Y})$  we could sample from  $\pi(\mathbf{y}^* \mid \mathbf{Y})$  and discard draws where  $y_j^* \neq x_j$  for any  $2 \leq j \leq p$ . This approach can be wasteful computationally since even in moderate dimensions most samples will be discarded. Instead we might prefer to estimate this distribution directly. We can write  $Pr(y_1^* \leq y \mid \mathbf{y}_{(-1)}^* = \mathbf{x}, \mathbf{Y})$  as

$$\int_{\mathcal{C}} \int_{\mathbb{R}^{p-1}} \left( \int_{-\infty}^{\hat{F}_1(y)} \pi(z_1^* \mid \mathbf{z}_{(-1)}^*, \mathbf{C}) dz_1^* \right) \pi(\mathbf{z}_{(-1)}^* \mid \mathbf{y}_{(-1)}^* = \mathbf{x}, \mathbf{C}) \pi(\mathbf{C} \mid \mathbf{Y}) d\mathbf{z}_{(-1)}^* d\mathbf{C} \quad (2.1)$$

Assume that  $y_2, \dots, y_p$  are discrete, or that the empirical cdfs are used for  $\hat{F}_j$  (if  $y_j$  is continuous and  $\hat{F}_j$  is a smooth estimator then  $z_j^* = \Phi^{-1}(\hat{F}_j(x_j))$  is fixed in the following). Then  $\pi(\mathbf{z}_{(-1)}^* \mid \mathbf{y}_{(-1)}^* = \mathbf{x}, \mathbf{C})$  is the  $(p-1)$ -dimensional truncated normal distribution  $N(\mathbf{0}, \mathbf{C}_{(-1)})$  where  $\mathbf{C}_{(-1)}$  is obtained by dropping the first row and column of  $\mathbf{C}$ , restricted to the set  $\mathcal{B}_x = \{\mathbf{z}_{(-1)}^*; \Phi^{-1}(\hat{F}_j(x_j^-)) < z_j^* \leq \Phi^{-1}(\hat{F}_j(x_j)) \forall 2 \leq j \leq p\}$  (where  $F(x^-)$  is the lower limit of  $F$  at  $x$ ). To estimate (2.1) from MCMC output we need to draw from this distribution (at least) once for every sample of  $\mathbf{C}$ . For a general  $\mathbf{C}$  this is prohibitive unless  $p$  is very small, but our factor-analytic representation allows us to efficiently draw from  $\pi(\mathbf{z}_{(-1)}^* \mid \mathbf{y}_{(-1)}^* = \mathbf{x}, \mathbf{C})$  by sampling  $(p-1)$  univariate truncated normals: Let  $\tilde{\mathbf{\Lambda}}_{(-1)}$  be  $\tilde{\mathbf{\Lambda}}$  with the first row removed and  $\mathbf{U}_{(-1)}$  be  $\mathbf{U}$  with the first row and column removed. Since  $\mathbf{C}_{(-1)} = \tilde{\mathbf{\Lambda}}_{(-1)} \tilde{\mathbf{\Lambda}}_{(-1)}' + \mathbf{U}_{(-1)}$  we have

$$\begin{aligned} \pi(\mathbf{z}_{(-1)}^* \mid \mathbf{y}_{(-1)}^* = \mathbf{x}, \tilde{\mathbf{\Lambda}}_{(-1)}) &\propto N(\mathbf{z}_{(-1)}^*; \mathbf{0}, \tilde{\mathbf{\Lambda}}_{(-1)} \tilde{\mathbf{\Lambda}}_{(-1)}' + \mathbf{U}_{(-1)}) \mathbf{1}((z_{(-1)}^* \in \mathcal{B}_x)) \\ &\propto \int_{\mathbb{R}^k} \prod_{j=2}^p \left( TN(\tilde{\lambda}_j \boldsymbol{\eta}, u_j, a_j, b_j) \right) N(\boldsymbol{\eta}; \mathbf{0}, \mathbf{I}) d\boldsymbol{\eta} \end{aligned}$$

where  $a_j = \Phi^{-1}(\hat{F}_j(x_j^-))$ ,  $b_j = \Phi^{-1}(\hat{F}_j(x_j))$  and  $\boldsymbol{\eta}$  is an auxiliary variable. Therefore we can approximate (2.1) as follows:

1. Draw  $\tilde{\boldsymbol{\Lambda}}$  via the PX-Gibbs sampler, and draw  $\boldsymbol{\eta} \sim N(\mathbf{0}, \mathbf{I})$
2. Draw  $z_j^* \sim TN(\tilde{\boldsymbol{\lambda}}_j \boldsymbol{\eta}, u_j, a_j, b_j)$  for  $2 \leq j \leq p$
3. For each distinct value of  $\mathbf{y}_1$  set  $\tilde{F}^{(t)}(y_i) = \int_{-\infty}^{\hat{F}_1(y_i)} N(z_1^*; m, v) dz_1^*$  where

$$\begin{aligned} m &= \tilde{\boldsymbol{\lambda}}_1 \tilde{\boldsymbol{\Lambda}}'_{(-1)} [\tilde{\boldsymbol{\Lambda}}_{(-1)} \tilde{\boldsymbol{\Lambda}}'_{(-1)} + \mathbf{U}_{(-1)}]^{-1} \mathbf{z}_{(-1)}^* \\ v &= 1 - \tilde{\boldsymbol{\lambda}}_1 \tilde{\boldsymbol{\Lambda}}'_{(-1)} [\tilde{\boldsymbol{\Lambda}}_{(-1)} \tilde{\boldsymbol{\Lambda}}'_{(-1)} + \mathbf{U}_{(-1)}]^{-1} \tilde{\boldsymbol{\Lambda}}_{(-1)} \tilde{\boldsymbol{\lambda}}_1' \end{aligned} \quad (2.2)$$

where again the matrix inverses in (2.2) can be computed efficiently as in (??). This procedure provides estimates of the conditional cdf at the observed data points. For a discrete response we can then directly compute conditional probabilities, odds ratios, and so on. When  $y_1$  is continuous these can be interpolated to give a histogram estimate of  $\pi(y_1 | \mathbf{y}_{(-1)} = \mathbf{x})$  with support on the range of the observed data. A number of modifications to this approach are possible; for example, to condition on a subset of  $\mathbf{y}_{(-1)}$  we simply drop the irrelevant rows of  $\boldsymbol{\Lambda}_{(-1)}$  and only perform step 3 for the  $j^{\text{th}}$  variable if we are conditioning on  $y_j$ .

This is a natural extension of factor regression models which posit a Gaussian factor model for  $(y_i, \mathbf{x}'_i)'$ , implying a linear regression model for  $\pi(y_i | \mathbf{x}_i)$  (Carvalho et al., 2008; West, 2003). These are especially useful when  $p > n$  as a model-based form of reduced rank regression (automatically selecting batches of correlated predictors by loading them highly on the same factor), or when there is missing data in  $\mathbf{X}$ . Here we have a flexible joint model which accommodates any ordered response or covariates while retaining the computational simplicity of factor regression models.

## References

- Carvalho, C. M., Chang, J., Lucas, J. E., Nevins, J. R., Wang, Q., and West, M. (2008). High-Dimensional Sparse Factor Modeling: Applications in Gene Expression Genomics. *Journal of the American Statistical Association*, 103(484):1438–1456.
- West, M. (2003). Bayesian factor regression models in the large  $p$ , small  $n$  paradigm. *Bayesian statistics*, 7(2003):723–732.
